# Supplementary material for: Rapid blood acid–base regulation by European sea bass ( Dicentrarchus labrax ) in response to sudden exposure to high environmental CO2
Source: Oxford University Press journal article supplement (doi:10.1242/jeb.242735), 2022-01-10
Supplement: jeb242735supp.pdf [file jeb242735supp.pdf]

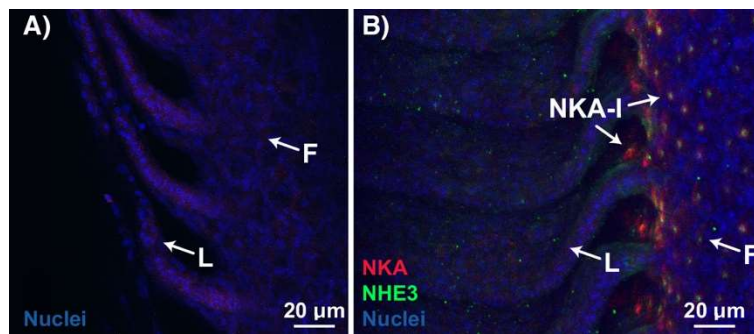

**Fig S1. A.** Na<sup>+</sup>/K<sup>+</sup>-ATPase (NKA, red) and Na<sup>+</sup>/H<sup>+</sup> Exchanger 3 (NHE3, green) immunostaining within European sea bass gill. Ionocytes containing NKA and NHE3 (NKA-I) were observed on the filament (F) and base of lamellae (L). **B.** Negative controls (no primary antibodies) had no discernible signal. Nuclei (blue) are stained with DAPI.

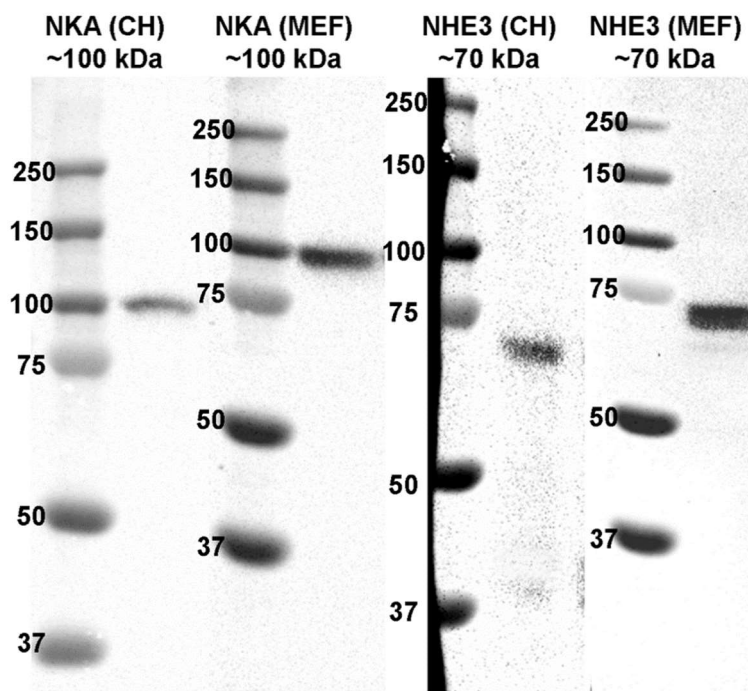

**Fig. S2.** Antibody verification on European sea bass gill tissue. The crude homogenate (CH) and membrane-enriched fraction (MEF) of sea bass gill tissue were immunolabeled with antibodies against Na<sup>+</sup>/K<sup>+</sup>-ATPase (NKA) and Na<sup>+</sup>/H<sup>+</sup> Exchanger 3 (NHE3). Molecular markers are shown on the left of each respective blot. Each antibody immunodetected a single band matching the predicted size of respective protein (~100 kDa for NKA, ~70 kDa for NHE3).

**Table S1.** Water chemistry of gill irrigation chambers used while blood sampling fish

|                        | Exposure length |               |               |               |
|------------------------|-----------------|---------------|---------------|---------------|
|                        | 0 min           | ~10 min       | ~40 min       | ~135 min      |
| Temperature (°C)       | 14.00 ± 0.00    | 14.05 ± 0.15  | 14.00 ± 0.30  | 13.95 ± 0.15  |
| pH (NBS)               | 8.14 ± 0.02     | 6.95 ± 0.02   | 6.91 ± 0.01   | 6.91 ± 0.04   |
| Salinity               | 34.6 ± 0.4      | 35.6 ± 0.5    | 34.8 ± 0.7    | 34.6 ± 0.7    |
| pCO <sub>2</sub> (kPa) | 0.060 ± 0.010   | 0.965 ± 0.045 | 1.227 ± 0.164 | 1.024 ± 0.088 |
| TA (μM)                | 3120 ± 372      | 2834 ± 36     | 3301 ± 361    | 2750 ± 27     |

**Table S2.** Mean ± s.e.m. of water chemistry parameters within isolation tanks and gill irrigation chambers during low alkalinity hypercapnia exposure

| Tank            | Duration (min) | pH (NBS)    | Temperature (°C) | Salinity   | pCO <sub>2</sub> (kPa) | TA (μM)   |
|-----------------|----------------|-------------|------------------|------------|------------------------|-----------|
| Isolation       | 135.0 ± 4.6    | 5.70 ± 0.03 | 13.78 ± 0.07     | 34.0 ± 0.1 | 1.141 ± 0.020          | 188 ± 12  |
| Gill irrigation | n/a            | 5.53 ± 0.31 | 14.05 ± 0.05     | 35.1 ± 0.3 | 1.288 ± 0.104          | 188 ± 129 |

**Table S3.** Mean ± s.e.m. of water chemistry parameters within isolation boxes prior to gill sampling. Gill samples from sea bass exposed to hypercapnia were taken from 5 sea bass immediately after flux measurements were completed.

| Treatment   | Duration (min) | pH (NBS)    | Temperature (°C) | Salinity   | pCO <sub>2</sub> (kPa) | TA (μM)  |
|-------------|----------------|-------------|------------------|------------|------------------------|----------|
| Normocapnia | n/a            | 8.05 ± 0.00 | 14.12 ± 0.06     | 33.6 ± 0.0 | 0.055 ± 0.001          | 2335 ± 7 |
| Hypercapnia | 132.9 ± 2.6    | 6.97 ± 0.02 | 14.14 ± 0.02     | 33.5 ± 0.0 | 0.770 ± 0.037          | 2365 ± 9 |

**Table S4.** Theoretical calculations of H<sup>+</sup> excretion by NHE in response to environmental hypercapnia. Calculations based on Parks *et al.* 2008. If Na<sup>+</sup><sub>i</sub>/Na<sup>+</sup><sub>e</sub> > H<sup>+</sup><sub>i</sub>/H<sup>+</sup><sub>e</sub> then H<sup>+</sup> excretion by NHE is thermodynamically unviable.

| Treatment               | Ionocyte Na <sup>+</sup><br>(Na <sup>+</sup> <sub>i</sub> , mM) | Seawater Na <sup>+</sup><br>(Na <sup>+</sup> <sub>e</sub> , mM) | Ionocyte H <sup>+</sup><br>(H <sup>+</sup> <sub>i</sub> , mM) | Seawater H <sup>+</sup><br>(H <sup>+</sup> <sub>e</sub> , mM) | Na <sup>+</sup> <sub>i</sub> /Na <sup>+</sup> <sub>e</sub> | H <sup>+</sup> <sub>i</sub> /H <sup>+</sup> <sub>e</sub> |
|-------------------------|-----------------------------------------------------------------|-----------------------------------------------------------------|---------------------------------------------------------------|---------------------------------------------------------------|------------------------------------------------------------|----------------------------------------------------------|
| Control                 | 140                                                             | 480                                                             | 3.98e <sup>-08</sup>                                          | 8.91e <sup>-09</sup>                                          | 0.292                                                      | 4.467                                                    |
| Hypercapnia             | 140                                                             | 480                                                             | 5.01e <sup>-08</sup>                                          | 1.12e <sup>-07</sup>                                          | 0.292                                                      | 0.447                                                    |
| Hypercapnia<br>+ low TA | 140                                                             | 480                                                             | 5.01e <sup>-08</sup>                                          | 2.00e <sup>-06</sup>                                          | 0.292                                                      | 0.025                                                    |
